# Supplementary material
Source: HighWire-hosted journal article supplement (https://gut.bmj.com/content/gutjnl-2019-319807)
Supplement: inline-supplementary-material-1 [file inline-supplementary-material-1.xlsx]

## Sheet: NCT Table
Supplementary Table 1 (Linked to Figure 1)
NCT #	Phase	Method	Delivery	Condition	Status
NCT02928523	1/2	FMT	Invasive	Cancer	Completed
NCT03341143	2	FMT	Invasive	Cancer	Suspended
NCT03353402	1	FMT	Both	Cancer	Recruiting
NCT03686202	1	FMT	Capsules	Cancer	Recruiting
NCT03772899	1	FMT	Capsules	Cancer	Recruiting
NCT03819296	1	FMT	Invasive	Cancer	Not yet recruiting
NCT03838601		FMT	Capsules	Cancer	Recruiting
NCT04040712		FMT	Invasive	Cancer	Completed
NCT04056026	1	FMT	Invasive	Cancer	Completed
NCT04116775	2	FMT	Invasive	Cancer	Recruiting
NCT04130763	1	FMT	Capsules	Cancer	Recruiting
NCT04163289	1	FMT	Capsules	Cancer	Recruiting
NCT01545908	2	FMT	Invasive	Inflammatory/ Autoimmune	Completed
NCT01560819	1	FMT	Invasive	Inflammatory/ Autoimmune	Completed
NCT01650038	2	FMT	Invasive	Inflammatory/ Autoimmune	Completed
NCT01742754		FMT	Invasive	Inflammatory/ Autoimmune	Terminated
NCT01790061	2/3	FMT	Invasive	Inflammatory/ Autoimmune	Recruiting
NCT01793831	4	FMT	Invasive	Inflammatory/ Autoimmune	Recruiting
NCT01847170	1	FMT	Invasive	Inflammatory/ Autoimmune	Completed
NCT01896635	2	FMT	Invasive	Inflammatory/ Autoimmune	Completed
NCT01947101	1	FMT	Invasive	Inflammatory/ Autoimmune	Completed
NCT01961492		FMT	Invasive	Inflammatory/ Autoimmune	Withdrawn
NCT02033408	4	FMT		Inflammatory/ Autoimmune	Active, not yet recruiting
NCT02049502	2	FMT	Invasive	Inflammatory/ Autoimmune	Completed
NCT02058524	1	FMT	Invasive	Inflammatory/ Autoimmune	Terminated
NCT02092402		FMT		Inflammatory/ Autoimmune	Completed
NCT02097797		FMT	Invasive	Inflammatory/ Autoimmune	Completed
NCT02108821	1	FMT	Invasive	Inflammatory/ Autoimmune	Completed
NCT02154867	2	FMT	Invasive	Inflammatory/ Autoimmune	Completed
NCT02199561	1/2	FMT	Invasive	Inflammatory/ Autoimmune	Completed
NCT02227342	1/2	FMT		Inflammatory/ Autoimmune	Completed
NCT02256592	1	FMT	Invasive	Inflammatory/ Autoimmune	Completed
NCT02269150	2	FMT	Invasive	Inflammatory/ Autoimmune	Active, not yet recruiting
NCT02291523	1	FMT	Invasive	Inflammatory/ Autoimmune	Recruiting
NCT02299973		FMT	Invasive	Inflammatory/ Autoimmune	Completed
NCT02328547	2	FMT	Capsules	Inflammatory/ Autoimmune	Completed
NCT02330653	1/2	FMT	Both	Inflammatory/ Autoimmune	Completed
NCT02391012	1	FMT	Invasive	Inflammatory/ Autoimmune	Terminated
NCT02417974	2	FMT	Invasive	Inflammatory/ Autoimmune	Suspended
NCT02428361	1	FMT	Invasive	Inflammatory/ Autoimmune	Completed
NCT02460705	1	FMT	Both	Inflammatory/ Autoimmune	Completed
NCT02487238	1	FMT	Invasive	Inflammatory/ Autoimmune	Completed
NCT02516384	1	FMT		Inflammatory/ Autoimmune	Completed
NCT02606032	2	FMT		Inflammatory/ Autoimmune	Recruiting
NCT02733744	1	FMT	Capsules	Inflammatory/ Autoimmune	Completed
NCT02734589		FMT	Invasive	Inflammatory/ Autoimmune	Recruiting
NCT02782325	1/2	FMT	Both	Inflammatory/ Autoimmune	Terminated
NCT02788071	2/3	FMT	Capsules	Inflammatory/ Autoimmune	Completed
NCT02847481	1	FMT		Inflammatory/ Autoimmune	Completed
NCT02897661		FMT	Invasive	Inflammatory/ Autoimmune	Recruiting
NCT02960074	1	FMT	Capsules	Inflammatory/ Autoimmune	Active, not yet recruiting
NCT03006809	1	FMT	Both	Inflammatory/ Autoimmune	Recruiting
NCT03008941	1/2	FMT	Capsules	Inflammatory/ Autoimmune	Completed
NCT03058900		FMT	Invasive	Inflammatory/ Autoimmune	Active, not yet recruiting
NCT03074227		FMT	Invasive	Inflammatory/ Autoimmune	Recruiting
NCT03078803	2	FMT	Both	Inflammatory/ Autoimmune	Recruiting
NCT03104036	2	FMT	Invasive	Inflammatory/ Autoimmune	Recruiting
NCT03106844	1/2	FMT	Invasive	Inflammatory/ Autoimmune	Active, not yet recruiting
NCT03122795		FMT	Invasive	Inflammatory/ Autoimmune	Completed
NCT03125564		FMT	Invasive	Inflammatory/ Autoimmune	Active, not yet recruiting
NCT03163784	1/2	FMT	Capsules	Inflammatory/ Autoimmune	Withdrawn
NCT03194529	1/2	FMT	Invasive	Inflammatory/ Autoimmune	Completed
NCT03267238	1	FMT	Invasive	Inflammatory/ Autoimmune	Active, not yet recruiting
NCT03273465	2	FMT	Capsules	Inflammatory/ Autoimmune	Recruiting
NCT03275467		FMT	Invasive	Inflammatory/ Autoimmune	Completed
NCT03329560	1	FMT	Capsules	Inflammatory/ Autoimmune	Completed
NCT03333291		FMT	Invasive	Inflammatory/ Autoimmune	Completed
NCT03359980	2	FMT		Inflammatory/ Autoimmune	Active, not yet recruiting
NCT03378167	1	FMT	Both	Inflammatory/ Autoimmune	Recruiting
NCT03378921	2	FMT	Invasive	Inflammatory/ Autoimmune	Completed
NCT03399188		FMT	Invasive	Inflammatory/ Autoimmune	Recruiting
NCT03483246	3	FMT	Invasive	Inflammatory/ Autoimmune	Recruiting
NCT03492502		FMT	Invasive	Inflammatory/ Autoimmune	Withdrawn
NCT03524352	3	FMT	Invasive	Inflammatory/ Autoimmune	Recruiting
NCT03538366		FMT	Invasive	Inflammatory/ Autoimmune	Completed
NCT03541733		FMT	Invasive	Inflammatory/ Autoimmune	Recruiting
NCT03545386	2	FMT	Invasive	Inflammatory/ Autoimmune	Recruiting
NCT03549676	1	FMT	Invasive	Inflammatory/ Autoimmune	Not yet recruiting
NCT03561519		FMT	Invasive	Inflammatory/ Autoimmune	Completed
NCT03561532		FMT	Invasive	Inflammatory/ Autoimmune	Active, not yet recruiting
NCT03582969	2	FMT	Capsules	Inflammatory/ Autoimmune	Recruiting
NCT03613545	2/3	FMT	Invasive	Inflammatory/ Autoimmune	Recruiting
NCT03678493	2	FMT	Capsules	Inflammatory/ Autoimmune	Recruiting
NCT03711006	1/2	FMT	Capsules	Inflammatory/ Autoimmune	Completed
NCT03716388	3	FMT	Invasive	Inflammatory/ Autoimmune	Recruiting
NCT03720392	2	FMT	Capsules	Inflammatory/ Autoimmune	Active, not yet recruiting
NCT03726645	1	FMT	Invasive	Inflammatory/ Autoimmune	Enrollment by invitation
NCT03747718	1	FMT	Invasive	Inflammatory/ Autoimmune	Not yet recruiting
NCT03804931	2/3	FMT	Invasive	Inflammatory/ Autoimmune	Recruiting
NCT03812705	2	FMT	Invasive	Inflammatory/ Autoimmune	Recruiting
NCT03819803	3	FMT	Invasive	Inflammatory/ Autoimmune	Recruiting
NCT03822299		FMT	Invasive	Inflammatory/ Autoimmune	Completed
NCT03829475	2	FMT	Invasive	Inflammatory/ Autoimmune	Recruiting
NCT03843385	2/3	FMT	Capsules	Inflammatory/ Autoimmune	Not yet recruiting
NCT03862079	2	FMT	Invasive	Inflammatory/ Autoimmune	Withdrawn
NCT03917095		FMT	Invasive	Inflammatory/ Autoimmune	Recruiting
NCT03926286	1	FMT	Invasive	Inflammatory/ Autoimmune	Completed
NCT03944096	2	FMT	Invasive	Inflammatory/ Autoimmune	Recruiting
NCT03948919	1	FMT	Capsules	Inflammatory/ Autoimmune	Recruiting
NCT03949257		FMT	Invasive	Inflammatory/ Autoimmune	Not yet recruiting
NCT03998488	2	FMT	Invasive	Inflammatory/ Autoimmune	Recruiting
NCT04011943		FMT	Capsules	Inflammatory/ Autoimmune	Enrollment by invitation
NCT04014413		FMT	Invasive	Inflammatory/ Autoimmune	Recruiting
NCT04034758		FMT	Capsules	Inflammatory/ Autoimmune	Not yet recruiting
NCT04038619	1	FMT	Invasive	Inflammatory/ Autoimmune	Not yet recruiting
NCT04059757	2	FMT	Capsules	Inflammatory/ Autoimmune	Not yet recruiting
NCT04100291		FMT	Invasive	Inflammatory/ Autoimmune	Recruiting
NCT04132427	2	FMT		Inflammatory/ Autoimmune	Recruiting
NCT04139577	1	FMT	Capsules	Inflammatory/ Autoimmune	Not yet recruiting
NCT04165200		FMT	Capsules	Inflammatory/ Autoimmune	Completed
NCT04202211	2	FMT	Both	Inflammatory/ Autoimmune	Not yet recruiting
NCT04203017	1	FMT	Capsules	Inflammatory/ Autoimmune	Recruiting
NCT04231110	4	FMT	Invasive	Inflammatory/ Autoimmune	Not yet recruiting
NCT04236843		FMT	Invasive	Inflammatory/ Autoimmune	Recruiting
NCT04238091	2	FMT	Invasive	Inflammatory/ Autoimmune	Not yet recruiting
NCT04251767		FMT	Invasive	Inflammatory/ Autoimmune	Withdrawn
NCT04269850	1/2	FMT	Capsules	Inflammatory/ Autoimmune	Recruiting
NCT04280471	1	FMT	Capsules	Inflammatory/ Autoimmune	Not yet recruiting
NCT04283968	1	FMT	Capsules	Inflammatory/ Autoimmune	Enrollment by invitation
NCT04285424	1	FMT	Invasive	Inflammatory/ Autoimmune	Recruiting
NCT04294615		FMT	Invasive	Inflammatory/ Autoimmune	Completed
NCT04300426	2	FMT	Invasive	Inflammatory/ Autoimmune	Recruiting
NCT04328922		FMT	Capsules	Inflammatory/ Autoimmune	Recruiting
NCT04336319	2	FMT	Both	Inflammatory/ Autoimmune	Recruiting
NCT04373473	2	FMT	Capsules	Inflammatory/ Autoimmune	Not yet recruiting
NCT04434872	2	FMT	Invasive	Inflammatory/ Autoimmune	Terminated
NCT04436874		FMT	Invasive	Inflammatory/ Autoimmune	Enrollment by invitation
NCT01226992	2/3	FMT	Invasive	Microbial Infection	Terminated
NCT01372943		FMT	Invasive	Microbial Infection	Terminated
NCT01398969	2	FMT	Invasive	Microbial Infection	Completed
NCT01704937	1	FMT	Invasive	Microbial Infection	Completed
NCT01842347		FMT		Microbial Infection	Withdrawn
NCT01868373	1	FMT	Invasive	Microbial Infection	Enrollment by invitation
NCT01905709		FMT	Invasive	Microbial Infection	Recruiting
NCT01914731	1	FMT	Capsules	Microbial Infection	Completed
NCT01925417	2	FMT	Invasive	Microbial Infection	Completed
NCT01959048		FMT	Invasive	Microbial Infection	Terminated
NCT01972334	2	FMT	Invasive	Microbial Infection	Completed
NCT02046525	2	FMT	Invasive	Microbial Infection	Completed
NCT02127398	2	FMT	Capsules	Microbial Infection	Recruiting
NCT02134392	1	FMT	Invasive	Microbial Infection	Recruiting
NCT02148601	2	FMT	Invasive	Microbial Infection	Completed
NCT02254811	2/3	FMT	Both	Microbial Infection	Completed
NCT02255305	2	FMT	Invasive	Microbial Infection	Recruiting
NCT02299570	2	FMT	Invasive	Microbial Infection	Completed
NCT02312986	1	FMT	Invasive	Microbial Infection	Active, not yet recruiting
NCT02318992	1/2	FMT	Invasive	Microbial Infection	Completed
NCT02343328	1	FMT	Capsules	Microbial Infection	Terminated
NCT02394275	2	FMT	Invasive	Microbial Infection	Terminated
NCT02403622	2	FMT	Invasive	Microbial Infection	Terminated
NCT02423967	1	FMT		Microbial Infection	Completed
NCT02449174	1/2	FMT	Both	Microbial Infection	Completed
NCT02465463	1/2	FMT	Invasive	Microbial Infection	Completed
NCT02543866	1	FMT	Invasive	Microbial Infection	Recruiting
NCT02570477		FMT	Invasive	Microbial Infection	Active, not yet recruiting
NCT02589847	2	FMT	Invasive	Microbial Infection	Completed
NCT02592343	2	FMT	Capsules	Microbial Infection	Completed
NCT02636517		FMT	Invasive	Microbial Infection	Active, not yet recruiting
NCT02686645	2/3	FMT	Invasive	Microbial Infection	Not yet recruiting
NCT02743234	3	FMT		Microbial Infection	Completed
NCT02770326		FMT	Invasive	Microbial Infection	Active, not yet recruiting
NCT02801656	3	FMT	Capsules	Microbial Infection	Not yet recruiting
NCT02816437	1	FMT	Invasive	Microbial Infection	Withdrawn
NCT02865616	1	FMT	Both	Microbial Infection	Completed
NCT02922816	1	FMT	Invasive	Microbial Infection	Recruiting
NCT02968511		FMT	Invasive	Microbial Infection	Withdrawn
NCT03005379	2/3	FMT	Capsules	Microbial Infection	Recruiting
NCT03029078	4	FMT	Invasive	Microbial Infection	Recruiting
NCT03050515	1	FMT	Invasive	Microbial Infection	Completed
NCT03061097	1	FMT	Both	Microbial Infection	Completed
NCT03063437	2	FMT	Capsules	Microbial Infection	Completed
NCT03107169		FMT		Microbial Infection	Completed
NCT03110133	2	FMT	Capsules	Microbial Infection	Active, not yet recruiting
NCT03167398	1/2	FMT	Capsules	Microbial Infection	Completed
NCT03218579		FMT		Microbial Infection	Recruiting
NCT03244644	3	FMT	Invasive	Microbial Infection	Active, not yet recruiting
NCT03268213	1	FMT	Invasive	Microbial Infection	Active, not yet recruiting
NCT03298048	2	FMT	Capsules	Microbial Infection	Terminated
NCT03350178	2	FMT		Microbial Infection	Terminated
NCT03353506	2	FMT	Capsules	Microbial Infection	Completed
NCT03367910	1/2	FMT	Invasive	Microbial Infection	Active, not yet recruiting
NCT03391674		FMT	Capsules	Microbial Infection	Withdrawn
NCT03427229	2	FMT	Invasive	Microbial Infection	Completed
NCT03479710	2	FMT	Invasive	Microbial Infection	Recruiting
NCT03497806	2	FMT	Capsules	Microbial Infection	Recruiting
NCT03527056	1	FMT	Capsules	Microbial Infection	Withdrawn
NCT03548051	1/2	FMT	Invasive	Microbial Infection	Active, not yet recruiting
NCT03562741		FMT	Invasive	Microbial Infection	Recruiting
NCT03617445	2	FMT	Invasive	Microbial Infection	Suspended
NCT03621657	2	FMT	Capsules	Microbial Infection	Terminated
NCT03643887	2	FMT	Capsules	Microbial Infection	Not yet recruiting
NCT03760484	2	FMT	Invasive	Microbial Infection	Recruiting
NCT03795233	1/2	FMT	Capsules	Microbial Infection	Suspended
NCT03796650	3	FMT	Invasive	Microbial Infection	Recruiting
NCT03802461	2/3	FMT	Invasive	Microbial Infection	Recruiting
NCT03804736		FMT	Capsules	Microbial Infection	Active, not yet recruiting
NCT03806803	2	FMT	Capsules	Microbial Infection	Recruiting
NCT03834038		FMT	Capsules	Microbial Infection	Active, not yet recruiting
NCT03834051		FMT	Invasive	Microbial Infection	Active, not yet recruiting
NCT03931941	3	FMT	Invasive	Microbial Infection	Recruiting
NCT03970200	2	FMT	Both	Microbial Infection	Active, not yet recruiting
NCT03973697	2	FMT	Both	Microbial Infection	Active, not yet recruiting
NCT04014413		FMT	Invasive	Microbial Infection	Recruiting
NCT04090346	4	FMT	Invasive	Microbial Infection	Enrollment by invitation
NCT04146337	2/3	FMT	Capsules	Microbial Infection	Not yet recruiting
NCT04181112		FMT	Invasive	Microbial Infection	Recruiting
NCT04188743	2/3	FMT	Invasive	Microbial Infection	Recruiting
NCT04431934		FMT	Both	Microbial Infection	Not yet recruiting
NCT02050607	2	FMT	Invasive	Other GI	Withdrawn
NCT02255617	1/2	FMT	Invasive	Other GI	Completed
NCT02424175	1/2	FMT	Invasive	Other GI	Completed
NCT02458079		FMT		Other GI	Completed
NCT02496390	1/2	FMT	Invasive	Other GI	Completed
NCT02530385	1/2	FMT	Capsules	Other GI	Completed
NCT02636647	1	FMT	Invasive	Other GI	Completed
NCT02689245		FMT	Invasive	Other GI	Completed
NCT02730962	2	FMT	Invasive	Other GI	Completed
NCT02731183		FMT	Invasive	Other GI	Completed
NCT02741518	1/2	FMT	Capsules	Other GI	Completed
NCT02862249	3	FMT	Invasive	Other GI	Recruiting
NCT02868164		FMT	Invasive	Other GI	Withdrawn
NCT03087097	1	FMT	Invasive	Other GI	Active, not yet recruiting
NCT03091010		FMT	Invasive	Other GI	Active, not yet recruiting
NCT03127696		FMT	Invasive	Other GI	Active, not yet recruiting
NCT03152188	1	FMT	Capsules	Other GI	Completed
NCT03273855		FMT	Invasive	Other GI	Enrollment by invitation
NCT03308461		FMT	Invasive	Other GI	Completed
NCT03363022		FMT	Invasive	Other GI	Withdrawn
NCT03391817		FMT	Invasive	Other GI	Recruiting
NCT03408886	2	FMT	Capsules	Other GI	Recruiting
NCT03416751	1	FMT	Invasive	Other GI	Completed
NCT03420482	2	FMT	Capsules	Other GI	Recruiting
NCT03439982	1/2	FMT	Invasive	Other GI	Recruiting
NCT03477916	2	FMT	Capsules	Other GI	Active, not yet recruiting
NCT03516461		FMT	Invasive	Other GI	Recruiting
NCT03568734		FMT		Other GI	Completed
NCT03633864	2	FMT	Invasive	Other GI	Recruiting
NCT03727321	2	FMT	Capsules	Other GI	Completed
NCT03789461		FMT	Invasive	Other GI	Active, not yet recruiting
NCT03796598	1/2	FMT	Both	Other GI	Recruiting
NCT03803540	1	FMT	Invasive	Other GI	Not yet recruiting
NCT03827772		FMT	Invasive	Other GI	Recruiting
NCT03829878	2	FMT	Capsules	Other GI	Not yet recruiting
NCT04014413		FMT	Invasive	Other GI	Recruiting
NCT04124211		FMT	Invasive	Other GI	Recruiting
NCT04142255	1	FMT	Capsules	Other GI	Recruiting
NCT04155099	2	FMT	Capsules	Other GI	Not yet recruiting
NCT04173208		FMT		Other GI	Recruiting
NCT04182633	2	FMT		Other GI	Recruiting
NCT04246398		FMT	Capsules	Other GI	Not yet recruiting
NCT04361097		FMT	Capsules	Other GI	Completed
NCT04371653	2	FMT	Capsules	Other GI	Not yet recruiting
NCT04373252	1	FMT	Invasive	Other GI	Not yet recruiting
NCT04406129	1/2	FMT	Capsules	Other GI	Not yet recruiting
NCT04431375		FMT		Other GI	Recruiting
NCT04465032	4	FMT	Invasive	Other GI	Recruiting
NCT02889627	2/3	FMT	Invasive	Neurological	Recruiting
NCT03026231	1/2	FMT	Capsules	Neurological	Withdrawn
NCT03183869	2	FMT	Invasive	Neurological	Terminated
NCT03279224	2/3	FMT	Invasive	Neurological	Recruiting
NCT03281044	2	FMT	Capsules	Neurological	Terminated
NCT03426826	1	FMT	Invasive	Neurological	Recruiting
NCT03594487	1	FMT	Invasive	Neurological	Recruiting
NCT03671785	1	FMT	Capsules	Neurological	Recruiting
NCT03691987	2	FMT	Invasive	Neurological	Recruiting
NCT03764748	1/2	FMT	Invasive	Neurological	Recruiting
NCT03766321		FMT	Invasive	Neurological	Recruiting
NCT03808389		FMT	Invasive	Neurological	Recruiting
NCT03876327	2/3	FMT	Invasive	Neurological	Completed
NCT03928808	1	FMT	Invasive	Neurological	Suspended
NCT03998423	1	FMT	Capsules	Neurological	Terminated
NCT04001439		FMT	Capsules	Neurological	Not yet recruiting
NCT04014413		FMT	Invasive	Neurological	Recruiting
NCT04096443	1	FMT	Capsules	Neurological	Recruiting
NCT04150549	2	FMT	Capsules	Neurological	Not yet recruiting
NCT04158427	1	FMT	Invasive	Neurological	Enrollment by invitation
NCT04014413		FMT	Invasive	Other	Recruiting
NCT04201821	1/2	FMT	Invasive	Other	Not yet recruiting
NCT04410003	1	FMT	Capsules	Other	Not yet recruiting
NCT03891979	4	Antibiotics	-	Cancer	Withdrawn
NCT03962920	-	Antibiotics	-	Cancer	Not yet recruiting
NCT01929122	-	Diet	-	Cancer	Completed
NCT02101970	-	Diet	-	Cancer	Completed
NCT02652715	-	Diet	-	Cancer	Completed
NCT03028831	-	Diet	-	Cancer	Recruiting
NCT03416777	-	Diet	-	Cancer	Recruiting
NCT03548948	-	Diet	-	Cancer	Completed
NCT03550885	-	Diet	-	Cancer	Recruiting
NCT03582306	-	Diet	-	Cancer	Completed
NCT03781778	-	Diet	-	Cancer	Recruiting
NCT03982537	-	Diet	-	Cancer	Withdrawn
NCT04066816	-	Diet	-	Cancer	Suspended
NCT04138654	-	Diet	-	Cancer	Completed
NCT04216251	-	Diet	-	Cancer	Completed
NCT04267874	-	Diet	-	Cancer	Recruiting
NCT03087903	-	Diet	-	Cancer	Active, not yet recruiting
NCT03268655	-	Diet	-	Cancer	Completed
NCT04046653	-	Diet	-	Cancer	Active, not yet recruiting
NCT02843425	-	Diet	-	Cancer	Active, not yet recruiting
NCT03383835	-	Diet	-	Cancer	Active, not yet recruiting
NCT03290651	-	Probiotics	-	Cancer	Recruiting
NCT03661047	-	Probiotics	-	Cancer	Recruiting
NCT03870607	-	Probiotics	-	Cancer	Recruiting
NCT03934827	-	Probiotics	-	Cancer	Recruiting
NCT04021589	-	Probiotics	-	Cancer	Recruiting
NCT04193904	-	Probiotics	-	Cancer	Recruiting
NCT04362826	-	Probiotics	-	Cancer	Not yet recruiting
NCT02706184	-	Probiotics	-	Cancer	Completed
NCT03782428	-	Probiotics	-	Cancer	Completed
NCT03358511	-	Probiotics	-	Cancer	Completed
